# Supplementary material
Source: Springer Nature journal article supplement (https://www.springermedizin.de/resource/supplementary/12943_2014_1306_MOESM2_ESM.pdf/9552670)

Trastuzumab  
Pertuzumab  
T-DM1

MM-121/MM-111  
AMG 888/U3-1287  
MP-RM-1/EV20

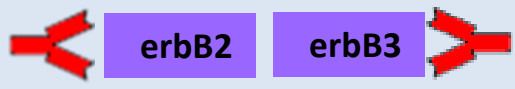

Ligands:

Unknown

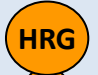

Heregulin (HRG)

Active Dimers:

Homo- and  
Hetero-dimers

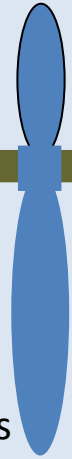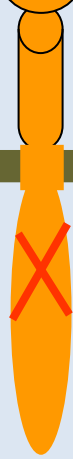

Hetero-dimers only

Tyrosine Kinase:

Active

Inactive or low

Approved Drugs:

Antibodies  
Kinase Inhibitors  
(Lapatinib)

None

Protein Translation

Entinostat

TGA *ERBB2* 3'-UTR AAAA TAA *ERBB3* 3'-UTR AAAA

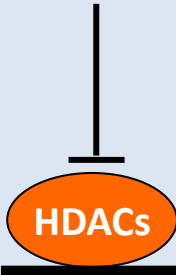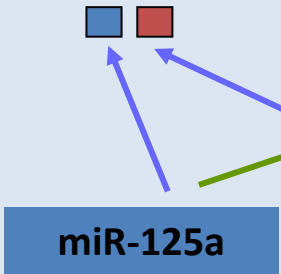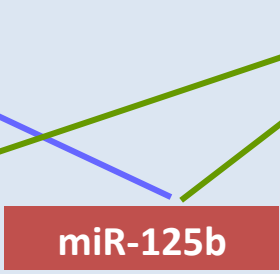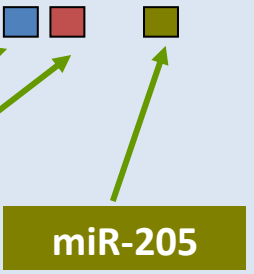

Supplement: MOESM2 [file 9552670]
